# Supplementary material for: Retracted Article: Synthesis of Fe3+-incorporated open-framework gallium borate catalyst for photocatalytic CO2 reduction driven by visible light irradiation
Source: Royal Society of Chemistry journal article supplement (doi:10.1039/c8qi01101j), 2018-01-01
Supplement: c8qi01101j1.pdf [file c8qi01101j1.pdf]

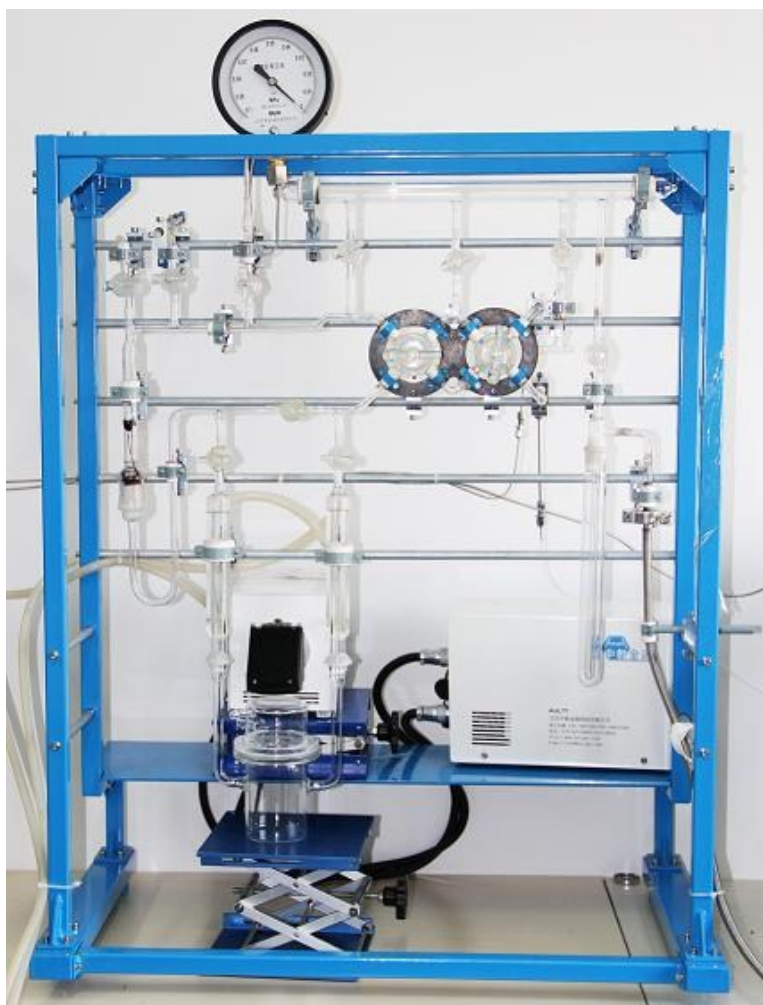

Fig. S1. The CEL-SPH2N system for photocatalytic performance tests

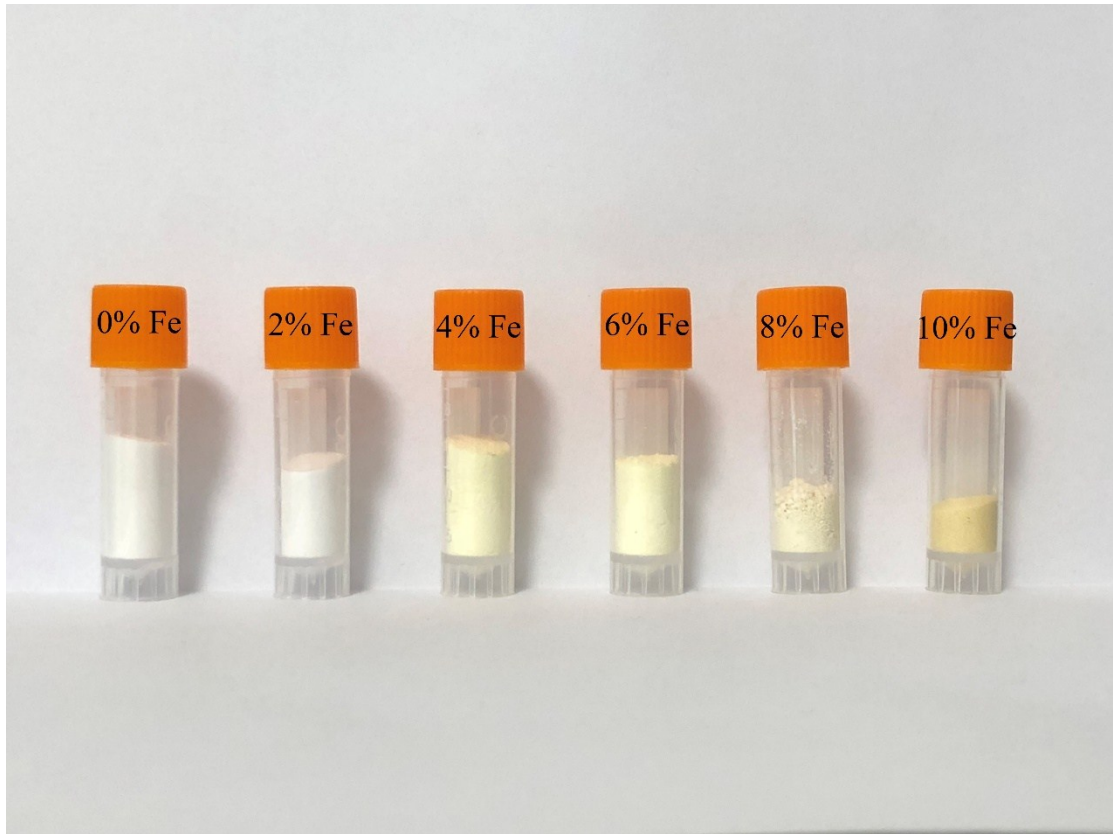

Fig. S2. The photograph of bare Ga-PKU-1 and Ga-PKU-1: $x\text{Fe}^{3+}$  ( $x = 0.02 \sim 0.10$ ) samples taken with a digital camera

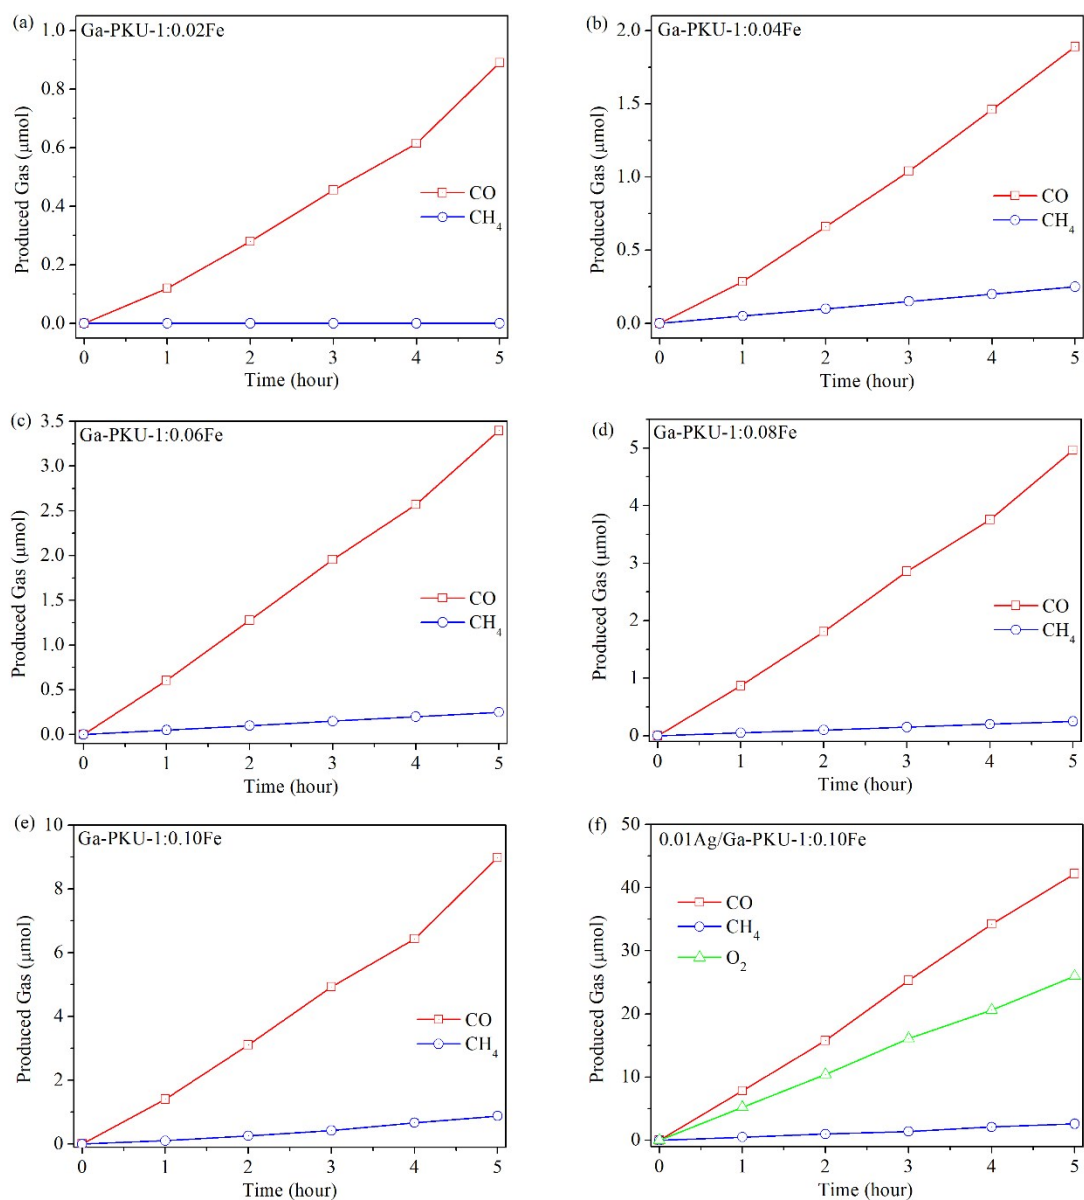

Fig. S3. (a)-(e) The yields of reduction and oxidation products over Ga-PKU-1:xFe<sup>3+</sup> samples ( $x = 0.02 \sim 0.10$ ); (f) The yields of reduction and oxidation products over 0.01Ag/Ga-PKU-1:0.10Fe<sup>3+</sup> sample.
